# Supplementary material for: Modest rise in chlamydia and gonorrhoea testing did not increase case detection in a clinical HIV cohort in Ontario, Canada
Source: PubMed Central journal article supplement — Sex Transm Infect. 2014 Sep 1;90(8):608–14. doi: 10.1136/sextrans-2014-051647 (PMC4251188; doi:10.1136/sextrans-2014-051647), 2014-09-01
Supplement: sextrans-2014-051647-s1.pdf [file sextrans-2014-051647-s1.pdf]

**Supplemental Table:** Characteristics of included and excluded participants in the analysis of chlamydia and gonorrhea testing, OHTN Cohort Study, 2008-2011

|                                                                        | Included Participants (N=3165) |                  | Excluded Participants (N=1030) |                     | P-value |
|------------------------------------------------------------------------|--------------------------------|------------------|--------------------------------|---------------------|---------|
|                                                                        | N                              | %                | N                              | %                   |         |
| Mean age at baseline (SD) <sup>a</sup>                                 |                                | 45.5 (10.0)      |                                | 46.8 (10.3)         | 0.0003  |
| STI Group                                                              |                                |                  |                                |                     |         |
| MSM                                                                    | 2179                           | 68.9%            | 550                            | 53.4%               | <.0001  |
| Non-MSM male                                                           | 383                            | 12.1%            | 251                            | 24.4%               |         |
| Female                                                                 | 534                            | 16.9%            | 203                            | 19.7%               |         |
| Unknown                                                                | 69                             | 2.2%             | 26                             | 2.5%                |         |
| Median year of HIV diagnosis (IQR)                                     |                                | 1998 (1992-2004) |                                | 1997 (1991-2003)    | 0.05    |
| Region of Ontario                                                      |                                |                  |                                |                     |         |
| Toronto                                                                | 2642                           | 83.5%            | 0                              | 0.0%                | <.0001  |
| Other                                                                  | 523                            | 16.5%            | 1030                           | 100.0%              |         |
| Ethnicity                                                              |                                |                  |                                |                     |         |
| White                                                                  | 1953                           | 61.7%            | 669                            | 65.0%               | <.0001  |
| Black/African                                                          | 451                            | 14.3%            | 100                            | 9.7%                |         |
| Aboriginal                                                             | 142                            | 4.5%             | 138                            | 13.4%               |         |
| Other                                                                  | 525                            | 16.6%            | 77                             | 7.5%                |         |
| Unknown                                                                | 94                             | 3.0%             | 46                             | 4.5%                |         |
| Education                                                              |                                |                  |                                |                     |         |
| High school or less                                                    | 904                            | 28.6%            | 338                            | 32.8%               | <.0001  |
| Trade school or college                                                | 921                            | 29.1%            | 245                            | 23.8%               |         |
| University                                                             | 1118                           | 35.3%            | 224                            | 21.8%               |         |
| Unknown                                                                | 222                            | 7.0%             | 223                            | 21.7%               |         |
| Income                                                                 |                                |                  |                                |                     |         |
| Less than \$20,000                                                     | 1246                           | 39.2%            | 387                            | 37.6%               | 0.0006  |
| \$20,000 to \$59,999                                                   | 1086                           | 34.3%            | 289                            | 28.1%               |         |
| \$60,000 or more                                                       | 538                            | 17.0%            | 118                            | 11.5%               |         |
| Unknown                                                                | 295                            | 9.3%             | 236                            | 22.9%               |         |
| Median # months of prospective follow-up (IQR)                         |                                | 36.0 (26.4-42.0) |                                | 22.2 (12.0-37.2)    | <.0001  |
| Median CD4 cell count/mm <sup>3</sup> at baseline (IQR) <sup>a,b</sup> |                                | 470 (330-640)    |                                | 468 (325.75-642.50) | 0.726   |
| Antiretroviral medication any time during follow-up                    | 2937                           | 92.8%            | 984                            | 95.5%               | 0.002   |
| Viral load at baseline <sup>a</sup>                                    |                                |                  |                                |                     |         |
| Undetectable (<50)                                                     | 1799                           | 56.8%            | 693                            | 61.5%               | <.0001  |
| Detectable but suppressed (50-199)                                     | 250                            | 7.9%             | 44                             | 4.3%                |         |
| Unsuppressed (200+)                                                    | 1079                           | 34.1%            | 293                            | 28.5%               |         |
| Unknown                                                                | 37                             | 1.2%             | 60                             | 5.8%                |         |

SD, standard deviation. IQR, interquartile range.

a) Baseline was defined as later of January 1, 2008 or enrolment date.

b) CD4 cell count was missing for 2.4% of participants for included participants and 20% for excluded participants.
